1 **Hippo Signaling Cofactor, WWTR1, at the Crossroads of Human Trophoblast Progenitor**  
2 **Self-Renewal and Differentiation.**

3

4 Soma Ray<sup>1,#</sup>, Abhik Saha<sup>1,#</sup>, Ananya Ghosh<sup>1</sup>, Namrata Roy<sup>1</sup>, Ram P Kumar<sup>1</sup>, Gudrun  
5 Meinhardt<sup>a</sup>, Abhirup Mukerjee<sup>1</sup>, Sumedha Gunewardena<sup>4</sup>, Rajnish Kumar<sup>1</sup>, Martin Knöfler<sup>a</sup> and  
6 Soumen Paul<sup>1,2,3,\*</sup>.

7 <sup>1</sup>Department of Pathology & Laboratory Medicine, <sup>2</sup>Department of Obstetrics and Gynecology,  
8 <sup>3</sup>Institute for Reproduction and Perinatal Research, <sup>4</sup>Department of Molecular and Integrative  
9 Physiology, University of Kansas Medical Center, Kansas City, Kansas, USA.

10

11 <sup>a</sup>Department of Obstetrics and Gynaecology, Reproductive Biology Unit, Placental Development  
12 Group; Medical University of Vienna, Austria.

13

14 #These authors contribute equally.

15

16 \*CORRESPONDING AUTHOR

17 Soumen Paul

18 University of Kansas Medical Center,

19 3098 HLSIC, MS 3050, Kansas City, KS 66160, USA

20 Email: spaul2@kumc.edu

21

22 Short Title: WWTR1 and Human Trophoblast Development

23

24 Key Words: Placenta, Human TSC, Cytotrophoblast, Hippo Signaling, WWTR1

25 **ABSTRACT**

26 Healthy progression of human pregnancy relies on cytotrophoblast progenitor (CTB) self-  
27 renewal and their differentiation towards multi-nucleated syncytiotrophoblasts (STBs) and  
28 invasive extravillous trophoblasts (EVTs). However, underlying molecular mechanisms that  
29 fine-tune CTB self-renewal or direct their differentiation towards STBs or EVTs during  
30 human placentation are poorly defined. Here, we show that hippo signaling cofactor WW  
31 Domain Containing Transcription Regulator 1 (WWTR1) is a master regulator of  
32 trophoblast fate choice during human placentation. Using human trophoblast stem cells  
33 (human TSCs), primary CTBs and human placental explants, we demonstrate that  
34 WWTR1 promotes self-renewal in human CTBs and is essential for their differentiation to  
35 EVTs. In contrast, WWTR1 prevents induction of STB fate in undifferentiated CTBs. Our  
36 single-cell RNA-sequencing analyses in first-trimester human placenta along with  
37 mechanistic analyses in human TSCs revealed that WWTR1 fine-tunes trophoblast fate by  
38 directly regulating Wnt signaling components. Importantly, our analyses of placentae from  
39 pathological pregnancies show that extreme preterm birth (gestational time  $\leq 28$  weeks)  
40 and intrauterine growth restriction along with preeclampsia (IUGR/PE) are often  
41 associated with loss of WWTR1 expression in CTBs. In summary, our findings establish a  
42 critical importance of WWTR1 at the crossroads of human trophoblast progenitor self-  
43 renewal vs. differentiation. It plays positive instructive roles to promote CTB self-renewal  
44 and EVT differentiation and safeguards undifferentiated CTBs from obtaining the STB  
45 fate.

46  
47  
48  
49  
50  
51  
52  
53  
54  
55  
56  
57  
58

59 **SIGNIFICANCE**

60 Human pregnancy relies on formation of the transient organ placenta and trophoblast  
61 cells are the major building blocks of the placenta. A defect in trophoblast progenitor  
62 self-renewal or their differentiation is associated with either pregnancy loss or  
63 pathological pregnancies, yet underlying molecular mechanisms that regulate  
64 trophoblast differentiation are poorly understood. In this study, we discovered that  
65 WWTR1, a transcription cofactor and a component of conserved Hippo signaling  
66 pathway, optimizes trophoblast progenitor self-renewal and is essential for their  
67 differentiation into the invasive extravillous trophoblast cell lineage. Our findings  
68 establish WWTR1 as a critical regulator for success in human placentation and  
69 progression of a healthy pregnancy.

70

71

72

73

74

75

76

77

78

79

80

81

82

83

84

85

86

87

88

89

90

91

92

93 **INTRODUCTION**

94 Establishment of human pregnancy is associated with formation of an invasive primitive  
95 syncytium from CTB progenitors at the blastocyst implantation site (1-3). Subsequently,  
96 proliferation and differentiation of CTB progenitors result in formation of the functional villous  
97 placenta, containing two types of matured villi; (i) floating villi, which float in the maternal  
98 blood and contain the STB population that establish the maternal-fetal nutrient and gas  
99 exchange interface and secretes human chorionic gonadotropin to maintain corpus luteum  
100 (4, 5), and (ii) anchoring villi, which anchor to maternal tissue and contain the invasive EVT  
101 population (Fig. 1A). In anchoring villi, CTB progenitors adapt a distinct differentiation  
102 pathway. At the base of the anchoring villi, CTB progenitors proliferate to form a CTB cell  
103 column. Eventually, cells at the distal ends of the CTB column differentiate to adapt a  
104 migratory phenotype, thereby establishing the invasive EVT lineage, which orchestrates the  
105 uterine environment, expresses non-classical human leucocyte antigen (HLA)-G and  
106 promotes immune tolerance to the fetus to secure progression of pregnancy (5-7). A subset  
107 of EVTs invades and remodels the uterine vasculature to establish enhanced maternal  
108 blood supply at the uterine-placental interface to fulfill the nutrient requirement of the growing  
109 fetus (8). Thus, self-renewal of CTB progenitors and their differentiation to STBs and EVTs  
110 in floating vs. anchoring villi are the essential events for progression of human pregnancy.  
111 Failures in these processes are implicated in early pregnancy loss or pregnancy-associated  
112 diseases such as preeclampsia, intrauterine growth restriction, and preterm birth (9-14).

113

114 Although CTBs establish the stem/progenitor compartment of a developing  
115 placenta, recent studies revealed that distinct populations of CTBs exist within a first-  
116 trimester placenta. *Ex vivo* developmental analyses of peri-implantation human embryos  
117 and global gene expression analyses including single-cell mRNA sequencing (scRNA-  
118 seq) revealed that during early stages of human placentation, along with undifferentiated  
119 CTBs, populations of mitotically active CTBs arise that are poised for either STB or EVT  
120 differentiation (15-17). In floating villi of the early first-trimester placenta (4-8 weeks),  
121 expression of CDX2 and ELF5 marks the undifferentiated stem-state CTBs (18, 19),  
122 which are not committed to the differentiation pathway, whereas mitotically active but  
123 differentiating CTBs can be identified by the expression of genes that are linked to the  
124 interferon response, like interferon gamma receptor 2 (IFNGR2), and cell cycle  
125 regulators such as CDK1 and CCNB2 (15, 16). In addition, a population of mitotically  
126 inactive CTBs, which are committed for STB differentiation, can be identified by the

127 expression of retroviral protein ERVFRD1 (16). Unlike in floating villi, CDX2 expression  
128 is suppressed in column CTBs within anchoring villi and ELF5 mRNA is expressed only  
129 in column CTBs near the base of the cell column (proximal column). Thus, it was  
130 proposed that ELF5 transcriptional activity regulates the trophoblast stem-state  
131 compartment of a developing human placenta (18). The undifferentiated column CTB  
132 subpopulation expresses integrin A2 (ITGA2) and NOTCH1 (20, 21). The transition of  
133 column CTBs to EVT<sub>s</sub> is associated with loss of ITGA2 expression and induction of  
134 specific genes, such as *ITGA1*, *MMP2* and human leukocyte antigen *HLA-G* (22-24).  
135 Thus, CTB self-renewal and differentiation during human placentation is a highly  
136 dynamic process and relies on molecular mechanisms that fine-tune the gene  
137 expression programs in different CTB progenitor subpopulations.

138

139 Molecular mechanisms that regulate trophoblast development during early  
140 human placentation were poorly understood due to ethical restrictions and lack of  
141 appropriate model systems. However, successful derivation of human trophoblast stem  
142 cells from CTBs of first-trimester human placentae (25) and success in CTB-organoid  
143 culture (26, 27) have provided excellent models to identify regulatory pathways that are  
144 involved in CTB self-renewal and their differentiation to STBs and EVT<sub>s</sub>. Using human  
145 TSCs and CTB organoids, we identified conserved Hippo signaling components,  
146 transcription factor TEAD4 and cofactor YAP1, as important regulators to maintain the  
147 self-renewal ability of CTBs in a developing human placenta (11, 28). We showed that  
148 TEAD4 and YAP1 are selectively expressed in undifferentiated CTBs and loss of either  
149 TEAD4 or YAP1 in CTBs impairs their self-renewal ability (11, 28).

150

151 Along with YAP1, TEAD4 can interact with other cofactors, such as VGLL1 and  
152 WWTR1, to regulate gene expression programs. Earlier study identified VGLL1 as a  
153 human-specific marker of proliferative CTBs and proposed a regulatory role for VGLL1 in  
154 the TEAD4-mediated gene expression program during human trophoblast lineage  
155 development (19). However, the importance of WWTR1, a paralog of YAP1 and VGLL1  
156 and another major cofactor of the Hippo signaling pathway, in human trophoblast  
157 development is yet to be defined.

158

159 Interestingly, studies focusing on trophoblast lineage development in mouse and  
160 marsupials indicated that YAP1 and WWTR1 might have redundant or mutually distinct

161 roles during trophoblast development. Studies with YAP1 and WWTR1 mutant mouse  
162 models revealed a redundant role in trophoblast lineage development. Although early  
163 trophoblast development was not impaired in either *Wwtr1*<sup>-/-</sup> or *Yap1*<sup>-/-</sup> embryos, the  
164 *Yap1/Wwtr1* double knockout embryos failed to form blastocysts due to defective  
165 development of the trophoctoderm lineage (29). In contrast to mouse, trophoblast cells  
166 of a developing marsupial embryo show distinct expression patterns of YAP1 and  
167 WWTR1. In marsupials, WWTR1 expression is strongly maintained within the nuclei of  
168 developing trophoblast lineage, whereas YAP1 expression is suppressed. Thus, it was  
169 predicted that WWTR1, but not YAP1, has a more important role in trophoblast  
170 maintenance in a developing marsupial embryo (30). Together, these studies indicated  
171 that WWTR1, either in conjunction with YAP1 or in an independent fashion, contributes  
172 to the trophoblast lineage development during mammalian placentation.

173

174 Here, using human TSCs, primary CTBs and placental explants, we have  
175 focused our attention on the functional importance of WWTR1 in human trophoblast  
176 development, especially in the context of CTB self-renewal and their differentiation to  
177 STBs and EVT. In addition, we examined possible correlation of defective WWTR1  
178 function in pathological pregnancies. We discovered that, similar to YAP1, WWTR1 is  
179 required to maintain self-renewal of CTB progenitors. In addition, WWTR1 is important to  
180 prevent STB differentiation and to induce the EVT differentiation program in CTBs. We  
181 also found that pregnancies associated with extreme preterm birth as well as preterm  
182 birth along with IUGR/PE are often associated with loss of WWTR1 in CTBs.  
183 Collectively, our findings implicate WWTR1 as an important orchestrator of trophoblast  
184 development during human placentation.

185

186

## 187 **RESULTS**

188 **During human placentation WWTR1 is expressed in CTB progenitors and the**  
189 **expression is induced during EVT development.**

190 To define the importance of WWTR1 in human trophoblast development, we  
191 tested WWTR1 protein expressions in first-trimester human placentae (6-8 weeks of  
192 gestation). As mentioned earlier, floating villi in a first-trimester human placenta contain  
193 two different layers of trophoblast cells: (i) a layer of CTB progenitors and (ii) the post-  
194 mitotic STB layer, overlaying the CTBs. In contrast, the anchoring villi contain the CTB

195 column and cells at the distal end of the CTB columns develop to the invasive EVT. We  
196 found that *WWTR1* is predominantly expressed in CTBs within floating villi (Fig. 1A,  
197 green arrows). We also noticed *WWTR1* expression in emerging EVT within anchoring  
198 villi (Fig. 1A, blue arrows). However, *WWTR1* expression is suppressed in differentiated  
199 STBs (Fig. 1A, red arrows) and in stromal cells (Fig. 1A, black arrows) within floating villi.  
200 We also tested *WWTR1* expression in term human placentae. Similar to first-trimester  
201 floating villi, *WWTR1* is only expressed in CTBs (Fig. 1B, green arrows) in a normal term  
202 human placenta and is repressed in STBs (Fig. 1B, red arrows) and in stromal cells (Fig. 1B,  
203 black arrows).

204

205 Single-cell RNA-sequencing (scRNA-seq) analyses with first-trimester human  
206 placentae revealed that a developing human placenta contains distinct CTB  
207 subpopulations, which could be identified via expression of specific genes (16). We  
208 hypothesized that *WWTR1* and other Hippo signaling cofactors, namely *YAP1* and  
209 *VGLL1*, might have distinct functions in different CTB subpopulations of a developing  
210 human placenta. Therefore, we compared expression of *WWTR1*, *YAP1* and *VGLL1* in  
211 different CTB subpopulations. To that end, we analyzed scRNA-seq data that we  
212 generated with first-trimester human placentae. Based on gene expression patterns,  
213 entire single cell populations of 6-8-week human placentae were distributed into 22 cell  
214 clusters (SI Appendix, Fig. S1A). Expressions of human cytokeratin 7 (*KRT7*) and human  
215 leukocyte antigen-A (*HLA-A*) distinguished the trophoblast cell clusters from non-trophoblast  
216 cells (SI Appendix, Fig. S1B). As *GATA3* and *TFAP2C* are expressed in all mononuclear  
217 trophoblast cells of a first-trimester human placenta (31), we tested and confirmed  
218 expressions of *GATA3* and *TFAP2C* mRNA in all single cell clusters comprising trophoblast  
219 cells (SI Appendix, Fig. S1C).

220

221 To identify distinct CTB subpopulations in single cell clusters, we compared  
222 expressions of *ELF5*, *CCNB2*, *ITGA2*, *ERVFRD1* and *HLA-G* (Fig. 1C). *ELF5*, which is  
223 expressed in the CTB subpopulation that maintains an undifferentiated stem-state, was  
224 detected mainly in cells of clusters 1 and 12 (Fig. 1C, upper left panel) and within a few cells  
225 of cluster 4. A recent study showed that the stem-state CTBs also express Basal Cell  
226 Adhesion Molecule (*BCAM*) (17) and analyses of single cell clusters showed that *BCAM* is  
227 predominantly expressed in *ELF5* expressing cells of clusters 1, 12 and cluster 4 (SI  
228 appendix, Fig. S1D). Thus, we concluded that the *ELF5/BCAM*-expressing cells within

229 clusters 1,12 and 4 comprise the undifferentiated stem-state CTB subpopulation. Expression  
230 of *CCNB2*, which marks all mitotically active CTBs of a first-trimester placenta, was detected  
231 in all *ELF5*-expressing cells of clusters 1, 12 and 4. *CCNB2* expression was also detected in  
232 a majority of cells within clusters 3-6 and 14 and in a few cells of cluster 2 (Fig. 1C, upper  
233 middle panel), indicating that those cell clusters contain mitotically active but differentiating  
234 CTBs. Interestingly, mRNA expression of *ITGA2*, which marks the CTB progenitors at the  
235 proximal column of an anchoring villous, was not detected in *ELF5*-expressing CTBs within  
236 clusters 1 and 12. Rather, *ITGA2* expressing cells were scattered within cells of cluster 2, 3,  
237 4, 5, 6, and 14 (Fig. 1C, upper right panel). We also noticed a similar expression pattern of  
238 *NOTCH1* (SI appendix, Fig. S1D). Thus, we concluded that the *ITGA2*-expressing cells of  
239 cluster 2, 3, 4, 5, 6 and 14 represent the proximal column CTB progenitors within anchoring  
240 villi.

241

242 *ERVFRD1*, an endogenous retroviral encoded cell-fusion gene, is shown to be  
243 expressed in mitotically inactive CTBs within a first-trimester human placenta (16). We  
244 detected *ERVFRD1* mRNA expression only within single-cells of cluster 11 (Fig. 1C, lower  
245 left panel), indicating that cells in cluster 11 represent the mitotically inactive CTBs that are  
246 committed for STB differentiation. High-level expression of HLA-G, which is induced in  
247 developing EVTs, was detected within cells of clusters 9, 18, 10 and a few cells of cluster 2  
248 (Fig. 1C, lower middle panel). Interestingly, the high level *HLA-G* expressing cells of clusters  
249 9, 18, 10 and 2 did not express *ITGA2*. Thus, we concluded that those cells were committed  
250 for EVT differentiation.

251

252 Next, we tested expressions of Hippo signaling cofactors in single cell clusters,  
253 representing different CTB subpopulations of a first-trimester human placenta. We found  
254 that *VGLL1* is highly expressed in almost all single trophoblast cells within a first-trimester  
255 placenta (Fig. 1C). However, *WWTR1* and *YAP1* showed contrasting expression patterns in  
256 *ELF5*-expressing stem-state CTBs vs. *CCNB2*-expressing differentiating CTB progenitors  
257 (Fig. 1D). *WWTR1* and *YAP1* are expressed in both stem-state and differentiating CTBs of  
258 clusters 1, 12 and 4, although, *YAP1* expression is higher in stem-state CTBs. In contrast,  
259 *WWTR1* expression is induced in differentiating CTBs of cell clusters 2, 3, 4, 5, 6 and 14  
260 (Fig. 1D). Cell clusters 2, 3, 5, 6 and 14 also contained *ITGA2*-expressing column CTB  
261 progenitors. We validated *WWTR1* expression in nearly all *ITGA2*-expressing CTBs,  
262 whereas *YAP1* expression was detected in a small fraction of *ITGA2*-expressing cells (SI



263 Appendix, Fig. S2A, B). Interestingly, a contrasting expression pattern of *YAP1* and *WWTR1*  
264 was also observed in mitotically inactive CTBs vs. emerging EVT. *YAP1* expression is  
265 maintained in *ERVFRD1*-expressing, mitotically inactive CTBs of cluster 11, and is reduced  
266 in *HLA-G* expressing cells of clusters 9, 18, 10 and 2 (Fig. 1D). In contrast, *WWTR1* is highly  
267 expressed in *HLA-G* expressing emerging EVT and is repressed in mitotically arrested  
268 CTBs (Fig. 1D).

269

270 Next, we tested *WWTR1* expression in human TSCs that were derived from first-  
271 trimester CTBs. Reverse transcription followed by quantitative PCR (RT-qPCR) showed that  
272 *WWTR1* mRNA is expressed in undifferentiated human TSCs and the expression is induced  
273 during EVT differentiation (SI Appendix, Fig. S3A). Western blot analyses confirmed  
274 induction of *WWTR1* protein expression during EVT differentiation in human TSCs (Fig. 1E).  
275 Immunofluorescence analyses showed that *WWTR1* is localized within nuclei in both  
276 undifferentiated TSCs and in TSC-derived EVT (SI Appendix, Fig. S3B). Collectively, our  
277 expression analyses indicated that during human placentation *WWTR1* might have  
278 important functional roles in CTB progenitors and promote their differentiation to EVT.

279

### 280 ***WWTR1* regulates self-renewal of human trophoblast progenitors.**

281 *WWTR1* is expressed in mitotically active CTBs within a first-trimester placenta and  
282 expression is maintained in CTB-derived Human TSCs. Therefore, we performed loss-of-  
283 function analyses to test the importance of *WWTR1* in human trophoblast progenitor self-  
284 renewal. We depleted *WWTR1* in human TSCs (*WWTR1-KD* human TSC) by RNA  
285 interference (RNAi) using lentiviral-mediated transduction of small hairpin RNAs (shRNAs)  
286 (Fig. 2A, B). In a culture condition that promotes human TSC proliferation at stem-state,  
287 *WWTR1-KD* human TSC showed loss of stem-state colony morphology and strong reduction  
288 in cell proliferation ability (Fig. 2C-E). We also tested self-renewal of *WWTR1-KD* human TSC  
289 by assessing their ability to form self-renewing 3-dimensional trophoblast organoids (TSC  
290 organoids). Unlike the control human TSCs, *WWTR1-KD* human TSCs showed severe  
291 impairment in organoid formation (Fig. 2F). Control human TSCs formed large organoids with  
292 prolonged culture (8-10 days) and could be dissociated and reorganized to form secondary  
293 organoids, indicating the self-renewing ability. In contrast, *WWTR1-KD* human TSCs formed  
294 much smaller organoids, which were not maintained upon passaging.

295

296           Next, we tested the impact of WWTR1 depletion on the self-renewal ability of primary  
297 CTBs that were isolated from first-trimester (6-10 weeks) human placentae. We depleted  
298 WWTR1 expression in primary CTBs via small interfering RNA (SiRNA) molecules (Fig. 2G,  
299 H) and tested the ability to form self-renewing 3-dimensional CTB-organoids. We found that  
300 similar to human TSCs, WWTR1-depletion in primary CTBs strongly inhibited organoid  
301 formation efficiency (Fig. 2I). Thus, loss-of-function studies in human TSCs and primary CTBs  
302 strongly indicated that WWTR1 plays an important role to maintain the self-renewal ability  
303 within mitotically active CTB progenitors of developing human placenta.

304

### 305 **WWTR1 directly regulates TP63 expression in human trophoblast progenitors.**

306           To understand how WWTR1 regulates trophoblast progenitor self-renewal, we  
307 performed global gene expression (RNA-seq) analyses in *WWTR1*-KD human TSCs.  
308 Depletion of WWTR1 in human TSCs significantly altered expression of 960 genes (216  
309 down-regulated and 744 up-regulated, SI Appendix, Dataset S1, Fig. S4A). RNA-seq  
310 analyses revealed that mRNA expression of *TP63*, which is implicated in maintenance of  
311 CTB stem-state (32), is strongly down-regulated in *WWTR1*-KD TSCs (Fig. 3A, SI  
312 Appendix, Fig. S4B). We confirmed TP63 down-regulation in *WWTR1*-KD TSCs via RT-  
313 qPCR and immunofluorescence analyses (Fig. 3B, C). Furthermore, using quantitative  
314 chromatin immunoprecipitation (ChIP-PCR) we detected WWTR1 occupancy at a  
315 conserved TEAD motif at the *TP63* locus in undifferentiated TSCs (Fig. 3D, E). These  
316 results indicate that WWTR1-mediated induction of *TP63* expression might be one of the  
317 molecular mechanisms to maintain self-renewal in stem-state CTBs within a developing  
318 human placenta.

319

### 320 **Discovery of a WWTR1-WNT regulatory axis in human trophoblast progenitors.**

321           Unbiased Gene Set Enrichment Analysis (GSEA) of RNA-seq data showed that  
322 loss of WWTR1 in human TSCs down-regulates transcription of various genes in the  
323 Wingless/Integrate (WNT) signaling pathway (Fig. 4A). A detailed look at the expression  
324 of WNT genes showed that six WNT genes, *WNT3*, *WNT4*, *WNT5B*, *WNT7A*, *WNT8B*  
325 and *WNT9A*, are repressed in *WWTR1*-KD TSCs (Fig. 4B). The WNT signaling pathway  
326 has been implicated as a key regulator for maintaining CTBs at a progenitor state (26).  
327 Gene expression analyses in first-trimester CTBs showed that many of the WNT genes,  
328 including *WNT3* and *WNT7A*, are expressed in undifferentiated CTBs (25) and activation  
329 of WNT signaling was key to successful derivation of human TSCs (25) and self-

330 renewing CTB organoids (26, 27). Therefore, we looked at expressions of WNT genes in  
331 CTB progenitors of a first-trimester human placenta at single-cell resolution.

332

333 scRNA-seq analyses showed that among six WNT genes, namely *WNT3*, *WNT4*,  
334 *WNT5B*, *WNT7A*, *WNT8B* and *WNT9A*, which are regulated by *WWTR1* in human  
335 TSCs, *WNT7A* is most abundantly and widely expressed in mitotically active CTBs (Fig.  
336 4C). *WNT3* and *WNT4* are also expressed in undifferentiated stem-state CTBs.  
337 However, compared to *WNT7A*, *WNT3* and *WNT4*-expressing CTBs are less abundant  
338 in a first-trimester placenta (Fig. 4C). *WNT5B* mRNA is not expressed in undifferentiated  
339 CTBs; rather, *WNT5B* mRNA expression was detected in a small number of  
340 differentiating, mitotically active CTBs (Fig. 4C), and *WNT8B* and *WNT9A* are not  
341 expressed in primary CTBs (SI Appendix, Fig. S5).

342

343 As scRNA-seq analyses identified *WNT7A* as the most abundantly expressed  
344 WNT gene in first-trimester CTBs, we tested *WNT7A* protein expression in human first-  
345 trimester placenta. We found that *WNT7A* is highly expressed in CTBs within floating  
346 villi, and expression is reduced but maintained in STBs (Fig. 4D, left panel). In anchoring  
347 villi, *WNT7A* is also expressed at the base of the CTB column and in the emerging EVT  
348 at the distal cell column (Fig. 4D, Right Panel).

349

350 Our expression analyses showed that among *WWTR1*-regulated WNT genes in  
351 human TSCs, *WNT3*, *WNT4* and *WNT7A* are expressed in primary CTBs and may  
352 contribute to the CTB self-renewal process. Therefore, we validated down-regulation of  
353 *WNT3*, *WNT4* and *WNT7A* mRNA expression in *WWTR1*-KD TSCs via RT-qPCR (Fig.  
354 4E). We also validated loss of *WNT7A* protein expression in *WWTR1*-KD TSCs (Fig.  
355 4F). Furthermore, using ChIP-PCR we found that *WNT7A* is a direct *WWTR1* target  
356 gene in human TSCs (Fig. 4G, H). Collectively, our experiments identified a *WWTR1*-  
357 WNT regulatory axis that could orchestrate gene expression programs in human CTB  
358 progenitors.

359

360 ***WWTR1* prevents induction of STB fate and promotes EVT differentiation in**  
361 **human trophoblast progenitors.**

362 Global gene expression analyses in *WWTR1*-KD human TSCs revealed strong  
363 up-regulation of many STB-specific genes, such as chorionic gonadotropin A (CGA),

364 chorionic gonadotropin B isoforms (CGBs) and pregnancy-specific beta-1-glycoproteins  
365 (PSGs), in a culture condition that maintains human TSC stem-state (Fig. 3A, SI  
366 Appendix, Dataset S1 and Fig. S4A, B). We confirmed induction of STB-specific gene  
367 transcripts in *WWTR1*-KD human TSCs via RT-qPCR (Fig. 5A). We also found that  
368 siRNA-mediated depletion of *WWTR1* in primary CTBs of first-trimester human  
369 placenta strongly induced CGB protein expression and secretion (Fig. 5B, C).  
370 Furthermore, at human TSC stem-state culture condition, extended culture of *WWTR1*-  
371 KD human TSCs often resulted in spontaneous cell-fusion and formation of  
372 multinucleated syncytium (Fig. 5D). The nuclei of those multinucleated syncytium  
373 expressed high levels of CGB, confirming induction of STB-differentiation fate in  
374 *WWTR1*-KD human TSCs in a culture condition that should maintain the TSC stem  
375 state. Taken together, our studies strongly indicated that, during human placentation,  
376 *WWTR1* function in CTB progenitors prevents induction of the STB differentiation  
377 program by suppressing expression of STB-specific genes.

378

379         The global gene expression analyses also revealed that mRNA expressions of  
380 *matrix metalloproteinase 2 (MMP2)*, *Placenta Associated 8 (PLAC8)* and *SMAD Family*  
381 *Member 3 (SMAD3)*, which are implicated in EVT development (33-35), were down-  
382 regulated in *WWTR1*-KD human TSCs (SI Appendix, Dataset S1). *MMP2* and other  
383 *MMPs* have been implicated in EVT development and invasion (33, 36). Thus, we tested  
384 mRNA expressions of *MMP* family members along with *PLAC8* and *SMAD3* in *WWTR1*-  
385 KD TSCs using RT-qPCR. We found that along with *PLAC8* and *SMAD3*, mRNA  
386 expressions of four *MMP* genes, *MMP2*, *MMP11*, *MMP14* and *MMP15* were significantly  
387 down-regulated in *WWTR1*-KD human TSCs (Fig. 6A). We also confirmed loss of *MMP2*  
388 and *SMAD3* protein expressions in *WWTR1*-KD human TSCs (Fig. 6B). Our single-cell  
389 gene expression analyses in first-trimester human placenta showed that all of these  
390 genes are either highly expressed (*MMP2*, *MMP14*, and *PLAC8*) or highly induced  
391 (*MMP11*, *MMP15* and *SMAD3*) in developing EVTs (cell clusters 9, 18, 10 and 2; Fig 6C,  
392 SI Appendix Fig. S6A), in which HLA-G expression was also induced (shown in SI  
393 Appendix, Fig. S1C). Therefore, we next tested the importance of *WWTR1* in EVT  
394 development.

395

396         We performed three different experiments to test the importance of *WWTR1* in EVT  
397 development. First, we tested EVT differentiation efficiency of *WWTR1*-KD human TSCs

398 and found that loss of *WWTR1* in human TSC strongly inhibits the efficiency of EVT  
399 differentiation (Fig. 6D, left panels). Next, we studied first-trimester CTB-derived organoids,  
400 which has been successfully utilized to test EVT development from primary CTBs (26, 27).  
401 EVT development was readily noticed when control CTB-organoids were cultured on  
402 matrigel. However, RNAi-mediated silencing of *WWTR1* expression nearly abrogated EVT  
403 emergence from CTB-organoid (Fig. 6D, right panels). Finally, we tested EVT emergence  
404 from human first-trimester placental explants after depleting *WWTR1* expression via RNAi  
405 (SI Appendix, Fig. S6B-C). Similar to our findings with human TSCs and primary CTBs, EVT  
406 emergence from first-trimester placental explants was strongly inhibited upon depletion of  
407 *WWTR1* expression (Fig. 6E and SI Appendix, Fig. S6D). Collectively, our studies in human  
408 TSCs, primary CTBs and placental explants identified *WWTR1* as an important regulator of  
409 EVT development.

410

411

#### 412 **Extreme Preterm birth is associated with loss of *WWTR1* expression in CTBs.**

413 Defective trophoblast development has been implicated as a major cause of  
414 pregnancy-associated diseases, including preterm birth, IUGR and preeclampsia. It was  
415 shown that extreme preterm birth is often associated with premature differentiation of  
416 villous CTBs (37). Furthermore, pregnancies associated with severe PE or severe IUGR  
417 often demonstrate depletion of proliferating CTBs (38). In addition, severe PE is also  
418 associated with increased syncytial knot formation (39), indicating that these  
419 pregnancies are associated with an imbalance in CTB self-renewal vs. differentiation  
420 process. As we discovered *WWTR1* as one of the important regulators to maintain self-  
421 renewal ability in CTBs, we tested whether *WWTR1* mRNA expression was altered in  
422 placentae from pregnancies that are associated with preterm birth, IUGR and PE (Fig.  
423 7A, B).

424

425 First, we tested *WWTR1* expression in placentae, which were associated with  
426 preterm birth without any reported complications of IUGR and PE, and compared that  
427 with placentae that are associated with normal term pregnancy. We analyzed 27  
428 placentae from preterm pregnancies without IUGR and PE, of which 12 placentae were  
429 associated with extreme preterm birth (babies were born at or before 28 weeks of  
430 pregnancy). Intriguingly, we found that *WWTR1* mRNA expression levels were  
431 significantly reduced in placentae from pregnancies associated with extreme preterm

432 birth (Fig. 7A). However, we have not noticed any significant change in *WWTR1* mRNA  
433 expression within placentae from preterm births, in which babies were born after 34  
434 weeks of pregnancy. As *WWTR1* is predominantly expressed in CTBs within a term  
435 placenta, we tested *WWTR1* protein expressions in placental sections associated with  
436 extreme preterm birth and found that the number of *WWTR1* expressing CTBs are  
437 drastically reduced in placentae from extreme preterm birth (Fig. 7C).

438

439 As IUGR and PE are often associated with preterm birth, we also tested *WWTR1*  
440 mRNA expression in placentae from preterm pregnancies, in which pregnancy duration  
441 was less than 34 weeks and were also characterized with either IUGR or PE or IUGR in  
442 combination with PE (IUGR/PE). We analyzed 44 IUGR placentae, 11 PE placentae and  
443 31 IUGR/PE placentae with average pregnancy duration of 33 weeks, 32 weeks and 30  
444 weeks, respectively. We found that *WWTR1* mRNA expressions in whole placentae are  
445 not significantly altered in pregnancies associated with IUGR or PE, whereas placentae  
446 associated with IUGR/PE pregnancies showed induction of *WWTR1* mRNA expression  
447 in whole placenta (Fig. 7B). However, when we tested *WWTR1* protein expressions via  
448 immunostaining, we hardly noticed presence of *WWTR1*-expressing CTBs in placentae  
449 from pregnancies with preterm birth along with IUGR/PE (Fig. 7C, 7D and SI Appendix,  
450 Fig. S7). Significant reduction in *WWTR1*-expressing CTBs was also noticed in  
451 placentae from preterm pregnancies with IUGR and PE (Fig. 7D and SI Appendix, Fig.  
452 S7). In contrast, we noticed increased infiltration of *WWTR1*-expressing cells within the  
453 stroma of those placentae (Red arrows, Fig. 7C). These results indicated that the  
454 increased *WWTR1* mRNA expression that we observed with whole placental tissues  
455 from IUGR/PE were not due to increased expression in CTBs or STBs. Rather; preterm  
456 birth with IUGR/PE is often associated with loss of *WWTR1*-expressing CTB population  
457 in placental villi. Taken together, our findings indicated that impaired *WWTR1* function in  
458 CTB progenitors could be one of the trophoblast-associated molecular causes in  
459 pathological pregnancies, such as extreme preterm birth.

460

461

## 462 **DISCUSSION**

463 An important aspect of human placentation is establishment of distinct gene expression  
464 programs in CTB progenitors of anchoring vs. floating villi. During early stages of human  
465 placentation, gene expression programs in floating villi are fine-tuned to support self-



466 renewal of CTB progenitors as well as instigation of the STB-specific differentiation  
467 program. The proper balance of CTB self-renewal and STB differentiation in floating villi  
468 ensure development of a mature placenta with an enormous surface area for nutrient  
469 and gas exchange at the maternal-fetal interface. Furthermore, continuous shedding of  
470 apoptotic STBs and incorporation of new STBs from the underlying CTB layer ensure  
471 maintenance of the functional STB layer throughout pregnancy. In contrast, in anchoring  
472 villi, gene expression programs within CTB progenitors are orchestrated to promote  
473 extensive proliferation to form a CTB column and to instigate an EVT-specific  
474 differentiation program in the distal cells of the CTB column. This extensive proliferation  
475 of the CTB column and EVT differentiation predominantly takes place during the first  
476 trimester of pregnancy. Thus, success in human pregnancy relies on the establishment  
477 of proper spatial and temporal gene expression programs in CTB progenitors of a  
478 developing placenta. Our findings in this study establish the hippo signaling cofactor  
479 WWTR1 as an essential regulator to orchestrate the gene expression program and  
480 balance self-renewal vs. differentiation in CTB progenitors. Our experimental findings  
481 indicate a bimodal function of WWTR1 in human trophoblast progenitors. In floating villi,  
482 it promotes CTB self-renewal and suppresses premature instigation of the STB  
483 differentiation fate, whereas in anchoring villi, WWTR1 function in CTB progenitors is  
484 important to instigate EVT differentiation. We also discovered that pregnancies  
485 associated with extreme preterm birth as well as IUGR/PE are often characterized with  
486 loss of WWTR1 expression in CTBs. Collectively, our findings implicate defective  
487 WWTR1 expression/function in CTBs as one of the molecular causes for adverse  
488 pregnancies.

489

490 Our findings that WWTR1 promotes CTB self-renewal along with our earlier  
491 reports showing essential roles of TEAD4 and YAP1 in maintenance of CTB self-renewal  
492 establishes the critical importance of the Hippo signaling pathway in human trophoblast  
493 development. These findings also indicate a functional redundancy of WWTR1 and  
494 YAP1 in CTB progenitors. However, our single cell resolution gene expression analyses  
495 indicated that YAP1 and WWTR1 are differentially expressed in distinct CTB  
496 subpopulations. High level of YAP1 expression is confined within the ELF5-expressing  
497 undifferentiated/stem-state CTB progenitors. Interestingly, expression of TEAD4 was  
498 also predominantly detected within the ELF5-expressing CTB subpopulations (11). In  
499 contrast, WWTR1 expression is induced in the CTB sub-population, which are mitotically

500 active but poised for differentiation. Thus, we propose that a TEAD4/YAP1  
501 transcriptional complex is important to maintain a ground level of stemness within  
502 undifferentiated CTB progenitors, whereas WWTR1 can interact with other TEAD family  
503 members to maintain the self-renewal ability in CTB progenitors, which are priming for  
504 differentiation, including the column CTBs of anchoring villi. Future studies involving  
505 identification of global targets in CTBs along with spatial single-cell genomics of  
506 developing human placenta will be instrumental to gain insights into the transcriptional  
507 programs that are established by YAP1 and WWTR1 in distinct CTB sub-populations.

508

509 Crosstalk of WNT signaling components with WWTR1 and YAP1 has been  
510 identified as an important regulatory axis in several cellular systems (40). The WNT  
511 signaling pathway has also been implicated in the CTB self-renewal process (26) as well  
512 as their differentiation to EVT<sub>s</sub> (41). However, the roles of individual WNT molecules in  
513 maintaining CTB self-renewal vs. differentiation are not well understood. Our findings in  
514 this study indicate a prominent role of WNT7A in human trophoblast development. We  
515 discovered WNT7A as the most abundantly expressed WNT molecule in CTBs of a first-  
516 trimester placenta, and its expression pattern is similar to WWTR1 in subpopulations of  
517 mitotically active CTBs and is a direct target of WWTR1 in CTB-derived human TSC<sub>s</sub>.  
518 WNT7A is highly expressed in CTBs within floating villi and at the base of the CTB  
519 column in anchoring villi. WNT7A expression is also detected in emerging EVT<sub>s</sub> at the  
520 distal columns of anchoring villi, indicating that the WWTR1-WNT7A signaling axis could  
521 be important for the CTB self-renewal process within the floating villi and EVT  
522 development in anchoring villi. WWTR1 also regulates expressions of other WNT  
523 molecules, such as WNT3 and WNT4 in human TSC<sub>s</sub>. Interestingly, our scRNA-seq  
524 analyses showed that, in a first-trimester human placenta, WNT3 and WNT4  
525 expressions, albeit at low level, are confined in stem-state CTBs, which also express  
526 high-levels of YAP1 and TEAD4. Thus, crosstalk among distinct WNT molecules and  
527 Hippo-signaling components might regulate gene expressions in different CTB sub-  
528 populations within a developing human placenta.

529

530 We found that WWTR1 is essential for EVT differentiation in human TSC<sub>s</sub> and  
531 emergence of EVT cells from first-trimester placental explants. Interestingly, WWTR1  
532 function in EVT development appears to be distinct from YAP1, which is suppressed in  
533 EVT<sub>s</sub>. We have shown that during EVT differentiation of human TSC<sub>s</sub>, WWTR1 is



534 required for optimal expression of MMP2, MMP11, MMP14 and MMP15. MMP2 has  
535 been shown to regulate EVT invasion (33, 36). Expressions of MMP11, MMP14 and  
536 MMP15 were earlier detected in human trophoblast cells, including EVTs within maternal  
537 decidua (36, 42). An earlier study showed that PLAC8 is selectively induced during EVT  
538 development and induces the formation of filopodia in migratory trophoblast cells (34).  
539 SMAD3 has also been implicated in EVT development. It was shown that depletion of  
540 SMAD3 but not SMAD2 suppresses EVT emergence from first-trimester human  
541 placental explants (35), indicating a specific role of SMAD3 during EVT development.  
542 Interestingly, our scRNA-seq analyses with first-trimester human placentae showed that  
543 all of these MMPs as well as PLAC8 and SMAD3 are induced in developing EVTs. Thus,  
544 our findings indicate that WWTR-1 might mediate multi-pronged roles during EVT  
545 development by regulating expressions of MMPs, PLAC8 and SMAD3. Given the  
546 dynamic nature of EVT development and the essential role of EVTs in human  
547 placentation, it is important to institute future studies to better understand the role of  
548 WWTR1 in EVT development and function.

549

550         The loss of WWTR1 expression in CTBs from pregnancies with extreme preterm-  
551 birth and IUGR/PE indicates a direct correlation of WWTR1 with adverse pregnancies.  
552 We also showed that loss of WWTR1 in human TSCs and primary CTBs promotes a  
553 premature differentiation to STB lineage. Inductions of STB-specific gene expression  
554 were also noticed when TEAD4 and YAP1 were depleted in human TSCs and CTBs,  
555 respectively. Intriguingly, elevated maternal serum levels of human chorionic  
556 gonadotropin (hCG) and Inhibin-A, measured at 15–20 weeks gestation, increase the  
557 subsequent risk of IUGR/PE and extreme preterm birth (37). Since both hCG and  
558 Inhibin-A are produced by STBs and extreme preterm birth are often associated with  
559 loss of proliferating CTBs (37), it was proposed that elevated levels of hCG and/or  
560 Inhibin-A may result from premature differentiation of the CTBs to adopt STB fate (35).  
561 Thus, our findings from this study and prior studies with TEAD4 and YAP1 (11, 28)  
562 support the hypothesis that during human placenta development, loss of hippo signaling  
563 components, such as WWTR1, YAP1 and TEAD4, may result in premature accelerated  
564 differentiation of CTBs to STBs, which subsequently contributes to adverse pregnancies,  
565 like extreme preterm birth and IUGR/PE.

566

567

## 568 **EXPERIMENTAL PROCEDURES**

569 **Human placental sample analysis:** De-identified and discarded first-trimester placental  
570 tissues and term placental samples from normal and pathological pregnancies were  
571 obtained from Mount-Sinai Hospital, Toronto or collected at the University of Kansas  
572 Medical Center. The IRB at Mount Sinai Hospital and the University of Kansas IRB  
573 approved all collections and studies. Fresh first-trimester placental tissues were  
574 embedded in OCT and cryo-sectioned or used for scRNA-seq analyses. To test EVT  
575 development, first-trimester placental explants were cultured on matrigel for 6-8 days in  
576 medium that promote EVT differentiation in human TSCs (see below).

577

578 **Single-Cell RNA sequencing and analysis:** Details of single-cell RNA-seq analyses  
579 with first-trimester placenta was performed and reported earlier (11). Briefly, single-cell  
580 suspensions from two first-trimester placentae were generated and transcriptomic  
581 profiles were obtained using the 10x Genomics Chromium Single Cell Gene Expression  
582 Solution (10xgenomics.com). The primary analysis of the scRNAseq data was  
583 performed using the 10x Genomics Cell Ranger pipeline (version 3.1.0). This pipeline  
584 performs sample de-multiplexing, barcode processing, and single cell 3' gene counting.  
585 The quality of the sequenced data was assessed using the FastQC software.  
586 Sequenced reads were mapped to the human reference genome (GRCh38) using the  
587 STAR software. Individual samples were aggregated using the “cellranger aggr” tool in  
588 Cell Ranger to produce a single feature-barcode matrix containing all the sample data.  
589 The Cell Ranger software was used to perform t-SNE projections of cells, and k-means  
590 clustering. The 10x Genomics Loupe Cell Browser software was used to find significant  
591 genes, cell types, and substructure within the single-cell data. The raw data for  
592 scRNAseq analyses are submitted to the GEO database  
593 (<http://www.ncbi.nlm.nih.gov/gds>), with accession number GSE145036.

594

595 **Human TSC culture:** Human TSC lines, derived from first trimester CTBs, were  
596 described earlier (11, 25). To maintain stem state culture, human TSCs were cultured on  
597 collagen IV-coated (5µg/ml) plate in DMEM/F12 medium, supplemented with 0.1 mM 2-  
598 mercaptoethanol, 0.2% FBS, 0.5% Penicillin-Streptomycin, 0.3% BSA, 1% ITS-X  
599 supplement, 1.5 µg/ml L-ascorbic acid, 50 ng/ml EGF, 2 µM CHIR99021, 0.5 µM A83-  
600 01, 1 µM SB431542, 0.8 mM Valproic acid and 5 µM Y27632. For EVT differentiation,  
601 TSCs were resuspended in 2% Matrigel (Corning, NY) and media containing DMEM/F12

602 supplemented with 0.3% BSA, 1% ITS-X, 0.5% Penicillin-Streptomycin, 100 $\mu$ M  $\beta$ -  
603 Mercaptoethanol, 2.5 $\mu$ M Y27632, 7.5 $\mu$ M A83-01, 100ng/ml hNRG1 and 4% Knockout  
604 serum. EVT differentiation medium without hNRG1 was replaced on day 3. On day 6 the  
605 media, lacking hNRG1 and KSR, was again replaced and finally analysed on day 8.

606

607 **RNA Interference (RNAi) in Human TSCs:** Lentiviral shRNAs were used to knockdown  
608 *WWTR1* (target sequence: GCGATGAATCAGCCTCTGAAT) in human TSCs. A  
609 scramble shRNA (Addgene-1864, CCTAAGGTTAAGTCGCCCTCGC) was used as  
610 control. Lentiviral particles were generated by transfecting plasmids into HEK-293T cells.  
611 Virus containing supernatant was collected and virus particles were concentrated by  
612 Lenti-X concentrator (Clontech Laboratories, CA) according to the manufacturer  
613 protocol. Human TSCs were transduced using viral particles at 60-70% confluency.  
614 Transduced cells were selected in the presence of puromycin (1.5-2 $\mu$ g/ml). Selected  
615 cells were tested for knockdown efficiency and used for further experimental analyses.

616

617 **CTB Isolation from first trimester placenta:** CTBs were isolated from 8-10<sup>th</sup> week first  
618 -trimester pooled placentae (n=8) as described (28). Briefly placentas were kept  
619 overnight in DMEM HAM's F12 (Gibco 31331-28)/ 0.05mg/mL gentamicin (Gibco 15710-  
620 049), 0.5 $\mu$ g/mL fungizone (Gibco 15290026). Next day placental villi were scraped in 1x  
621 Hank's Balanced Salt Solution (HBSS, Sigma H4641) collected by centrifugation and  
622 incubated for two consecutive digestions with 1x HBSS containing 0.125% trypsin  
623 (Gibco 15090-046) and 0.125mg/mL DNase I (Sigma-Aldrich DN25) at 37°C in the  
624 incubator. Cells were purified by Percoll (cytiva 17089101) gradient centrifugation.  
625 Contaminating erythrocytes were lysed by incubation with erythrocyte lysis buffer  
626 (155mM NH<sub>4</sub>Cl, 10mM KHCO<sub>3</sub>, 0.1mM EDTA, pH 7.3) for 5min at room temperature.  
627 The cell suspension was seeded onto cell culture dishes for 45 min to allow  
628 contaminating stromal cells to adhere to the plastic. Trophoblasts were collected from  
629 the supernatants by centrifugation. HLAG<sup>+</sup> EVTs were depleted from the cell suspension  
630 by immune-purification using HLA-G PE labeled antibodies (Exbio Clone MEM-G/9, 1P-  
631 292-C100), PE MACS beads (Miltenyi biotec 130-048-801) and MACS MS columns  
632 (Miltenyi biotec 130-042-201). Purified Trophoblasts were seeded in DMEM-Ham's F12  
633 (Gibco 31331-28)/ 10% FBS (Sigma S0615-500ML) 0.05mg/mL gentamicin (Gibco  
634 15710-049), 0.5 $\mu$ g/mL fungizone (Gibco 15290026) onto fibronectin coated cell culture  
635 dishes (2 $\mu$ g/cm<sup>2</sup>, Merck FC010). For siRNA mediated gene silencing, one hour later a

636 proportion of the cell culture media was replaced by siRNA/RNAimax containing media  
637 prepared as described (43) by using non targeting ( D-001810-10-20) or TAZ ( L-  
638 016083-00-0005) ON-TARGETplus SMARTpools and Lipofectamine RNAimax  
639 (Invitrogen 13778-075).

640

641 **Placental explants culture:** First-trimester placental explants were submerged in  
642 DMEM/F12(Gibco) media and divided into smaller pieces under the dissection  
643 microscope in sterile conditions. Pieces containing branching villous like structure were  
644 washed in phosphate buffer saline (PBS) supplemented with 10% fetal bovine serum  
645 (FBS) and then subjected to lentiviral treatment. The explants were divided into two  
646 groups, one group was incubated with scrambled lentiviral particles while the other  
647 group was incubated with lentiviral particles carrying shRNA for *WWTR1* gene  
648 knockdown. Both the groups were incubated with the respective lentiviral particles for  
649 6hrs, at 37 °C in a humidified chamber in a 5% CO<sub>2</sub>/95% air gas mixture. After 6 hours  
650 the explant pieces were rinsed and encapsulated in gel for further culture. For the  
651 encapsulation, Growth factor reduced Matrigel (Corning) was mixed 1:1 with DMEM/F12  
652 on ice to make matrigel suspension. 200ul of the matrigel suspension was added to  
653 each well of a 24-well plate and explants were placed centrally and covered with another  
654 200ul of matrigel suspension. The plate was then incubated at 37 °C in a humidified  
655 chamber in a 5% CO<sub>2</sub> for the gel-suspension to solidify thereby encapsulating the  
656 explant. Finally, 300ul of EVT media was added to each well and allowed to culture. EVT  
657 media was changed on days 3 and 5 as mentioned earlier.

658

659 **RNA-Seq analysis:** RNA sequence analysis was performed according to published  
660 protocol (44, 45). Total RNA from the control human TSCs as well as *WWTR1*-KD  
661 human TSCs were isolated using RNeasy Mini Kit (Qiagen, 74104) per the  
662 manufacturer's protocol with on column DNase digestion. RNA concentrations were  
663 quantified using a NanoDrop Spectrophotometer at a wavelength of 260nm. Integrity of  
664 the total RNA samples was evaluated using an Agilent 2100 Bioanalyzer (Agilent  
665 Technologies Inc., Santa Clara, CA). The total RNA fraction was processed by oligo dT  
666 bead capture of mRNA, fragmentation and reverse transcription into cDNA. After ligation  
667 with the appropriate Unique Dual Index (UDI) adaptors, cDNA library was prepared  
668 using the Universal Plus mRNA-seq +UDI library preparation kit (NuGEN 0508-08, 0508-

669 32). The raw data for RNA-seq analyses are available at GEO database with accession  
670 number GSE188738.

671

### 672 **Statistical significance:**

673 Statistical significances were determined for quantitative RT-PCR analyses for mRNA  
674 expression and for cell proliferation analyses. We have performed at least n=3  
675 experimental replicates for all of those experiments. For statistical significance of  
676 generated data, statistical comparisons between two means were determined with  
677 Student's t-test and significantly altered values ( $p \leq 0.01$ ) are highlighted in figures by an  
678 asterix. RNA-Seq data were generated with n=4 experimental replicates per group. The  
679 statistical significance of altered gene expression (absolute fold change  $\geq 2.0$  and FDR q-  
680 value  $\leq 0.05$ ) was initially confirmed with right tailed Fisher's exact test. For *WWTR1*  
681 mRNA expression analyses in pathological placentae, one-way analysis of variance is  
682 used to determine statistically significant differences in mean *WWTR1* expression in a  
683 specific pathological condition, such as extreme preterm birth, with term control  
684 placentae.

685

### 686 **Data Availability**

687 The raw data for RNA-seq analyses are available at GEO database  
688 (<http://www.ncbi.nlm.nih.gov/gds>) with accession number GSE188738. The raw data for  
689 single-cell RNA-seq in first-trimester human placenta is also available in GEO database  
690 (accession number GSE145036).

691

692 **(Additional details of experimental procedures are mentioned in the SI**  
693 **Appendix.)**

694

### 695 **ACKNOWLEDGEMENTS**

696 This research was supported by NIH grants **HD101319**, HD062546, HD0098880,  
697 **HD103161** and **HD102188** and a pilot grant under NIH Center of Biomedical Research  
698 Program (COBRE, P30GM122731) to Soumen Paul. We acknowledge the Genomics  
699 Core, the Imaging and Histology Core and the Bioinformatics Core of the University of  
700 Kansas Medical Center. We thank Drs. Hiroaki Okae and Takahiro Arima of Tohoku

701 University Graduate School of Medicine, Japan, for sharing human TSC lines. We thank  
702 Ms. Brandi Miller for critical comments on the manuscript.

703

704

705

706

707

708

709

710

711

712

713

714

715

716

717

718

719

720

721

722

723

724

725

726

727

728

729

730

731

732

733

734

735 **REFERENCES**

736

- 737 1. Knofler M, *et al.* (2019) Human placenta and trophoblast development: key  
738 molecular mechanisms and model systems. *Cellular and molecular life sciences* :  
739 *CMLS*.
- 740 2. James JL, Carter AM, & Chamley LW (2012) Human placentation from nidation  
741 to 5 weeks of gestation. Part I: What do we know about formative placental  
742 development following implantation? *Placenta* 33(5):327-334.
- 743 3. Boss AL, Chamley LW, & James JL (2018) Placental formation in early  
744 pregnancy: how is the centre of the placenta made? *Hum Reprod Update*  
745 24(6):750-760.
- 746 4. Chang CW, Wakeland AK, & Parast MM (2018) Trophoblast lineage  
747 specification, differentiation and their regulation by oxygen tension. *J Endocrinol*  
748 236(1):R43-R56.
- 749 5. Costa MA (2016) The endocrine function of human placenta: an overview.  
750 *Reprod Biomed Online* 32(1):14-43.
- 751 6. Beer AE & Sio JO (1982) Placenta as an immunological barrier. *Biology of*  
752 *reproduction* 26(1):15-27.
- 753 7. PrabhuDas M, *et al.* (2015) Immune mechanisms at the maternal-fetal interface:  
754 perspectives and challenges. *Nat Immunol* 16(4):328-334.
- 755 8. Soares MJ, Varberg KM, & Iqbal K (2018) Hemochorial placentation:  
756 development, function, and adaptations. *Biology of reproduction* 99(1):196-211.
- 757 9. Burton GJ, Fowden AL, & Thornburg KL (2016) Placental Origins of Chronic  
758 Disease. *Physiol Rev* 96(4):1509-1565.
- 759 10. Brosens I, Pijnenborg R, Vercruysse L, & Romero R (2011) The "Great  
760 Obstetrical Syndromes" are associated with disorders of deep placentation.  
761 *American journal of obstetrics and gynecology* 204(3):193-201.
- 762 11. Saha B, *et al.* (2020) TEAD4 ensures postimplantation development by  
763 promoting trophoblast self-renewal: An implication in early human pregnancy  
764 loss. *Proceedings of the National Academy of Sciences of the United States of*  
765 *America*.
- 766 12. Lim KH, *et al.* (1997) Human cytotrophoblast differentiation/invasion is abnormal  
767 in pre-eclampsia. *Am J Pathol* 151(6):1809-1818.
- 768 13. Hustin J, Jauniaux E, & Schaaps JP (1990) Histological study of the materno-  
769 embryonic interface in spontaneous abortion. *Placenta* 11(6):477-486.



- 770 14. Romero R, Kusanovic JP, Chaiworapongsa T, & Hassan SS (2011) Placental  
771 bed disorders in preterm labor, preterm PROM, spontaneous abortion and  
772 abruptio placentae. *Best Pract Res Clin Obstet Gynaecol* 25(3):313-327.
- 773 15. West RC, *et al.* (2019) Dynamics of trophoblast differentiation in peri-  
774 implantation-stage human embryos. *Proceedings of the National Academy of*  
775 *Sciences of the United States of America* 116(45):22635-22644.
- 776 16. Liu Y, *et al.* (2018) Single-cell RNA-seq reveals the diversity of trophoblast  
777 subtypes and patterns of differentiation in the human placenta. *Cell Res*  
778 28(8):819-832.
- 779 17. Shannon MJ, *et al.* (2022) Cell trajectory modeling identifies a primitive  
780 trophoblast state defined by BCAM enrichment. *Development* 149(1).
- 781 18. Hemberger M, Udayashankar R, Tesar P, Moore H, & Burton GJ (2010) ELF5-  
782 enforced transcriptional networks define an epigenetically regulated trophoblast  
783 stem cell compartment in the human placenta. *Hum Mol Genet* 19(12):2456-  
784 2467.
- 785 19. Soncin F, *et al.* (2018) Comparative analysis of mouse and human placentae  
786 across gestation reveals species-specific regulators of placental development.  
787 *Development* 145(2).
- 788 20. Lee CQE, *et al.* (2018) Integrin alpha2 marks a niche of trophoblast progenitor  
789 cells in first trimester human placenta. *Development* 145(16).
- 790 21. Haider S, *et al.* (2016) Notch1 controls development of the extravillous  
791 trophoblast lineage in the human placenta. *Proceedings of the National Academy*  
792 *of Sciences of the United States of America* 113(48):E7710-E7719.
- 793 22. Damsky CH, Fitzgerald ML, & Fisher SJ (1992) Distribution patterns of  
794 extracellular matrix components and adhesion receptors are intricately  
795 modulated during first trimester cytotrophoblast differentiation along the invasive  
796 pathway, in vivo. *J Clin Invest* 89(1):210-222.
- 797 23. Isaka K, *et al.* (2003) Expression and activity of matrix metalloproteinase 2 and 9  
798 in human trophoblasts. *Placenta* 24(1):53-64.
- 799 24. Kovats S, *et al.* (1990) A class I antigen, HLA-G, expressed in human  
800 trophoblasts. *Science* 248(4952):220-223.
- 801 25. Okae H, *et al.* (2018) Derivation of Human Trophoblast Stem Cells. *Cell stem cell*  
802 22(1):50-63 e56.
- 803 26. Haider S, *et al.* (2018) Self-Renewing Trophoblast Organoids Recapitulate the  
804 Developmental Program of the Early Human Placenta. *Stem cell reports*.
- 805 27. Turco MY, *et al.* (2018) Trophoblast organoids as a model for maternal-fetal  
806 interactions during human placentation. *Nature* 564(7735):263-267.



- 807 28. Meinhardt G, *et al.* (2020) Pivotal role of the transcriptional co-activator YAP in  
808 trophoblast stemness of the developing human placenta. *Proceedings of the*  
809 *National Academy of Sciences of the United States of America* 117(24):13562-  
810 13570.
- 811 29. Nishioka N, *et al.* (2009) The Hippo signaling pathway components Lats and Yap  
812 pattern Tead4 activity to distinguish mouse trophectoderm from inner cell mass.  
813 *Developmental cell* 16:398-410.
- 814 30. Frankenberg S, Shaw G, Freyer C, Pask AJ, & Renfree MB (2013) Early cell  
815 lineage specification in a marsupial: a case for diverse mechanisms among  
816 mammals. *Development* 140(5):965-975.
- 817 31. Lee CQ, *et al.* (2016) What Is Trophoblast? A Combination of Criteria Define  
818 Human First-Trimester Trophoblast. *Stem cell reports* 6(2):257-272.
- 819 32. Li Y, Moretto-Zita M, Leon-Garcia S, & Parast MM (2014) p63 inhibits extravillous  
820 trophoblast migration and maintains cells in a cytotrophoblast stem cell-like state.  
821 *Am J Pathol* 184(12):3332-3343.
- 822 33. Staun-Ram E, Goldman S, Gabarin D, & Shalev E (2004) Expression and  
823 importance of matrix metalloproteinase 2 and 9 (MMP-2 and -9) in human  
824 trophoblast invasion. *Reproductive biology and endocrinology : RB&E* 2:59.
- 825 34. Chang WL, *et al.* (2018) PLAC8, a new marker for human interstitial extravillous  
826 trophoblast cells, promotes their invasion and migration. *Development* 145(2).
- 827 35. Brkic J, *et al.* (2020) Differential Role of Smad2 and Smad3 in the Acquisition of  
828 an Endovascular Trophoblast-Like Phenotype and Preeclampsia. *Front*  
829 *Endocrinol (Lausanne)* 11:436.
- 830 36. Cohen M, Meisser A, & Bischof P (2006) Metalloproteinases and human  
831 placental invasiveness. *Placenta* 27(8):783-793.
- 832 37. Fitzgerald B, *et al.* (2011) Villous trophoblast abnormalities in extremely preterm  
833 deliveries with elevated second trimester maternal serum hCG or inhibin-A.  
834 *Placenta* 32(4):339-345.
- 835 38. Macara L, *et al.* (1996) Structural analysis of placental terminal villi from growth-  
836 restricted pregnancies with abnormal umbilical artery Doppler waveforms.  
837 *Placenta* 17(1):37-48.
- 838 39. Huppertz B, Kadyrov M, & Kingdom JC (2006) Apoptosis and its role in the  
839 trophoblast. *American journal of obstetrics and gynecology* 195(1):29-39.
- 840 40. Azzolin L, *et al.* (2012) Role of TAZ as mediator of Wnt signaling. *Cell*  
841 151(7):1443-1456.
- 842 41. Knofler M & Pollheimer J (2013) Human placental trophoblast invasion and  
843 differentiation: a particular focus on Wnt signaling. *Front Genet* 4:190.

- 844 42. Anacker J, *et al.* (2011) Human decidua and invasive trophoblasts are rich  
845 sources of nearly all human matrix metalloproteinases. *Mol Hum Reprod*  
846 17(10):637-652.
- 847 43. Rosner M, *et al.* (2010) Efficient siRNA-mediated prolonged gene silencing in  
848 human amniotic fluid stem cells. *Nat Protoc* 5(6):1081-1095.
- 849 44. Home P, *et al.* (2017) Genetic redundancy of GATA factors in the extraembryonic  
850 trophoblast lineage ensures the progression of preimplantation and  
851 postimplantation mammalian development. *Development* 144(5):876-888.
- 852 45. Bhattacharya B, *et al.* (2020) Atypical protein kinase C iota (PKC $\lambda$ /iota)  
853 ensures mammalian development by establishing the maternal-fetal exchange  
854 interface. *Proceedings of the National Academy of Sciences of the United States*  
855 *of America* 117(25):14280-14291.  
856  
857  
858  
859  
860  
861  
862  
863  
864  
865  
866  
867  
868  
869  
870  
871  
872  
873  
874  
875  
876  
877  
878  
879

880 **FIGURE LEGENDS**

881 **Figure 1: WWTR1 expression in human placentation site.**

882 (A) Immunostained images show WWTR1 protein expression in a first-trimester (week 8)  
883 human placental villous. WWTR1 expression was detected in CTBs within floating villi  
884 (green arrows) and in developing EVT<sub>s</sub> (blue arrows) in anchoring villi. However,  
885 WWTR1 protein expression was undetectable in STBs (red arrows) and in stromal cells  
886 (black arrows) within floating villi. (B) Immunostained image shows WWTR1 protein  
887 expression in a normal term human placenta. WWTR1 is expressed in CTBs (green  
888 arrows). STBs (red arrows) and stromal cells (black arrows) do not express WWTR1. (C)  
889 t-SNE plots of the single-cell clusters of first-trimester human placental samples.  
890 Expressions of specific genes were monitored to identify clusters of different CTB  
891 progenitors and developing EVT<sub>s</sub>. (D) t-SNE plots showing differential mRNA expression  
892 patterns of *YAP1* and *WWTR1* in single cell clusters, obtained by scRNA-seq analyses  
893 in first-trimester human placentae. *YAP1* is highly expressed in clusters of stem-state  
894 CTBs (green circles) and in CTBs of cluster 11 (red circle), which are mitotically  
895 arrested. In contrast, WWTR1 expression induced in mitotically active but differentiating  
896 CTBs and in cells of cluster 9,10, 18, and a part of clusters 2 (blue circles), which  
897 represent developing EVT<sub>s</sub>. (E) Western blots show induction of WWTR1 protein  
898 expression in human TSCs upon differentiation to EVT<sub>s</sub>.

899

900 **Figure 2: Loss-of WWTR1 impairs self-renewal in human TSCs and primary CTBs.**

901 (A) *WWTR1* and *YAP1* mRNA expressions were tested in human TSCs without (control)  
902 and with WWTR1-depletion by shRNA [*WWTR1*-KD]. Plot shows strong reduction of  
903 *WWTR1*-mRNA expression in *WWTR1*-KD human TSCs did not significantly alter *YAP1*  
904 mRNA expression (mean  $\pm$  SE; n = 3, p $\leq$ 0.005) (B) Western blot analyses showing  
905 depletion of WWTR1 protein expression in *WWTR1*-KD human TSCs over three  
906 passages. (C) Equal number of control and *WWTR1*-KD human TSCs were plated and  
907 cultured in stem-state culture condition. Micrographs confirm reduced cell proliferation in  
908 *WWTR1*-KD human TSCs. (D) Images show BRDU incorporation in control and  
909 WWTR1-depleted human TSCs, when cultured in stem-state culture condition over 72h.  
910 (E) Plot shows growth kinetics of human TSCs, without and with WWTR1 depletion. (F)  
911 Micrographs show inefficient organoid formation by *WWTR1*-KD human TSCs. (G) and  
912 (H) RT-qPCR and Western blot analysis, respectively, showing RNAi-mediated depletion  
913 of WWTR1 expression in primary CTBs, isolated from human first-trimester placentae.

914 (I) Micrographs show inefficient organoid formation by *WWTR1*-depleted (*WWTR1*-KD)  
915 primary CTBs.

916

917 **Figure 3. *WWTR1* directly regulates *TP63* expression in human TSCs.**

918 (A) Volcano plot showing global gene expression changes in *WWTR1*-KD human TSCs.  
919 Unbiased RNA-seq analyses were performed and  $\geq 2$ -fold gene-expression changes in  
920 *WWTR1*-KD human TSCs with a false discovery rate of  $P < 0.05$  were indicated with  
921 colored dots (blue: up-regulated, red: down-regulated). Significant down-regulation in  
922 expression of *TP63* (a marker of undifferentiated CTBs), *PLAC8*, *MMP2* (important for  
923 EVT development), *WNT7A*, and up-regulation of *CGB1* and *PSG4* (STB-specific genes)  
924 are indicated. (B) RT-qPCR (mean  $\pm$  SE;  $n = 3$ ,  $p \leq 0.001$ ) and (C) Immunofluorescence  
925 images, respectively, confirming down-regulation of *TP63* expression in *WWTR1*-KD  
926 human TSCs. (D) rVISTA alignment plot of a conserved TEAD-motif containing region of  
927 human and rhesus macaque *TP63* genes. The conserved TEAD-motif (in red letters)  
928 along with adjacent base sequences and associated coordinate on the human *TP63*  
929 gene are indicated. (E) The plot shows *WWTR1* occupancy at the conserved TEAD-  
930 motif of the *TP63* locus (shown in panel D) in human TSCs (mean  $\pm$  SE;  $n = 3$ ,  $p \leq 0.01$ ).

931

932 **Figure 4. *WWTR1* regulates WNT signaling components in human TSCs.**

933 (A) GSEA of differentially expressed genes showing down-regulation of WNT-signaling  
934 genes in *WWTR1*-KD human TSCs. The heat map shows specific genes that were  
935 down-regulated in *WWTR1*-KD human TSCs. Various WNT family members are  
936 highlighted. (B) The table shows average expression levels of all *WNT* genes that were  
937 expressed in human TSCs. WNT Genes that were down-regulated in *WWTR1*-KD  
938 human TSCs are highlighted. (C) t-SNE plots showing differential mRNA expression  
939 patterns of *WNT* genes in single cell clusters representing stem-state and differentiating  
940 CTBs of first-trimester human placentae. (D) Immunofluorescence images show *WNT7A*  
941 protein expression in trophoblast cells of first-trimester placental villi. Representative  
942 images of floating and anchoring villi are shown. (E) RT-qPCR analyses confirming  
943 *WNT3*, *WNT4* and *WNT7A* mRNA expressions in *WWTR1*-KD human TSCs (mean  $\pm$   
944 SE;  $n = 4$ , \*,  $p < 0.01$ , \*\*,  $p \leq 0.001$ ). (F) Immunofluorescence images confirms loss of and  
945 *WNT7A* protein expression in *WWTR1*-KD human TSCs. (G) rVISTA alignment plot of a  
946 conserved TEAD-motifs containing region of human and rhesus macaque *WNT7A*  
947 genes. Conserved TEAD-motif (in red letters) along with adjacent base sequences and

948 associated coordinate on the human *WNT7A* gene, where WWTR1 occupancy was  
949 detected in human TSCs, are indicated. (H) Quantitative ChIP analysis identified  
950 WWTR1 occupancy at the region with highlighted conserved TEAD-motifs of the *WNT7A*  
951 locus (shown in panel G) in human TSCs (mean  $\pm$  SE; n = 3, p<0.01).

952

953 **Figure 5. WWTR1 prevents STB-differentiation in human TSCs and primary CTBs.**

954 (A) RT-qPCR analyses confirming induction of mRNA expressions STB-specific genes,  
955 *CGA*, *CGB*, *ERVFRD1* and *PSG4* in *WWTR1*-KD human TSCs (mean  $\pm$  SE; n = 4,  
956 p $\leq$ 0.005). (B) RT-qPCR analyses confirming *CGB* mRNA expressions in CTBs, isolated  
957 from first-trimester human placentae upon siRNA-mediated depletion of *WWTR1* (mean  
958  $\pm$  SE; n = 3, p $\leq$ 0.01). (C) Western blot analyses confirming induction of CGB protein  
959 expression in *WWTR1*-depleted CTBs (D) Fluorescence images show propensity of  
960 STB-differentiation in *WWTR1*-KD human TSCs, when cultured in stem-state culture  
961 conditions for three passages. *WWTR1*-KD human TSCs showed enhanced propensity  
962 of cell fusion with multi-nucleated cells and loss of E-Cadherin expression (white  
963 arrows). The nuclei of fused cells also showed higher level of CGB protein expression.

964

965 **Figure 6. WWTR1 regulates EVT development.**

966 (A) RT-qPCR analyses confirming down-regulation of mRNA expressions of *MMP2*,  
967 *MMP11*, *MMP14*, *MMP15*, *PLAC8* and *SMAD3* in *WWTR1*-KD human TSCs (mean  $\pm$   
968 SE; n = 4, p<0.01). (B) Western blot analyses confirming loss of MMP2 and SMAd3  
969 protein expressions in *WWTR1*-KD human TSCs. (C) t-SNE plots showing mRNA  
970 induction of *MMP2*, *MMP11*, *MMP15* and *SMAD3* in single cell clusters representing  
971 developing EVTs of first-trimester human placentae. Note that the cell clusters  
972 representing stem-state CTBs mostly lack mRNA expressions of *MMP2*, *MMP11*, and  
973 *SMAD3* and have much less mRNA expression of *MMP15*. (D) Representative phase  
974 contrast images show inefficient EVT development from *WWTR1*-KD human TSCs (left  
975 panels) and first-trimester CTB-Organoids (right panels). In a culture condition that  
976 promote EVT differentiation, control TSCs and CTB-organoids readily developed EVTs  
977 with characteristic elongated spindle-shaped cell protrusions (shown in red arrows).  
978 However, EVT development was strongly impaired from *WWTR1*-KD human TSCs and  
979 *WWTR1*-KD CTB organoids. (E) Immunofluorescence images show impairment of EVT  
980 emergence from human first-trimester placental explants upon WWTR1-depletion.  
981 Invasive EVTs were readily developed (highlighted with white ellipse) when first-

982 trimester placental explants were cultured on matrigel in a culture condition that promote  
983 EVT differentiation. EVT emergence was strongly inhibited from placental explants, in  
984 which *WWTR1* expression was depleted.

985

986 **Figure 7. *WWTR1* expression is impaired in CTBs in pathological pregnancies.**

987 (A) RT-qPCR analyses of *WWTR1* mRNA expression from mRNAs isolated from whole  
988 placental tissues from pregnancies with gestational age  $\geq 38$  week (Term control),  
989 preterm-birth ( $\geq 34$  weeks) or extreme preterm birth ( $\leq 28$  weeks). (\* indicates significant  
990 change ( $p < 0.01$ ) in *WWTR1* mRNA expression in placentae from extreme preterm birth)

991 (B) RT-qPCR analyses of *WWTR1* mRNA expression from mRNAs isolated from whole  
992 placentae that were collected from pregnancies with preterm birth along with IUGR, PE  
993 or both IUGR and PE (IUGR/PE). (\* Indicates significant change ( $p < 0.01$ ) in *WWTR1*  
994 mRNA expression in placentae with preterm birth along with IUGR/PE)). (C)

995 Representative immunostained images show lack of *WWTR1*-expressing CTBs (Black  
996 arrows) in placentae from pregnancies that are associated with extreme preterm birth or  
997 preterm birth in association with IUGR/PE. Red arrows indicate *WWTR1*-expressing

998 non-trophoblast cells. (D) *WWTR1* expressing CTBs were quantitated from 10 different  
999 placental sections from normal term pregnancy or from preterm pregnancies with IUGR,

1000 PE or IUGR/PE. The plot shows significant ( $p < 0.01$ ) reduction in *WWTR1*-expressing  
1001 CTBs in pathological pregnancies.

1002



Fig. 1

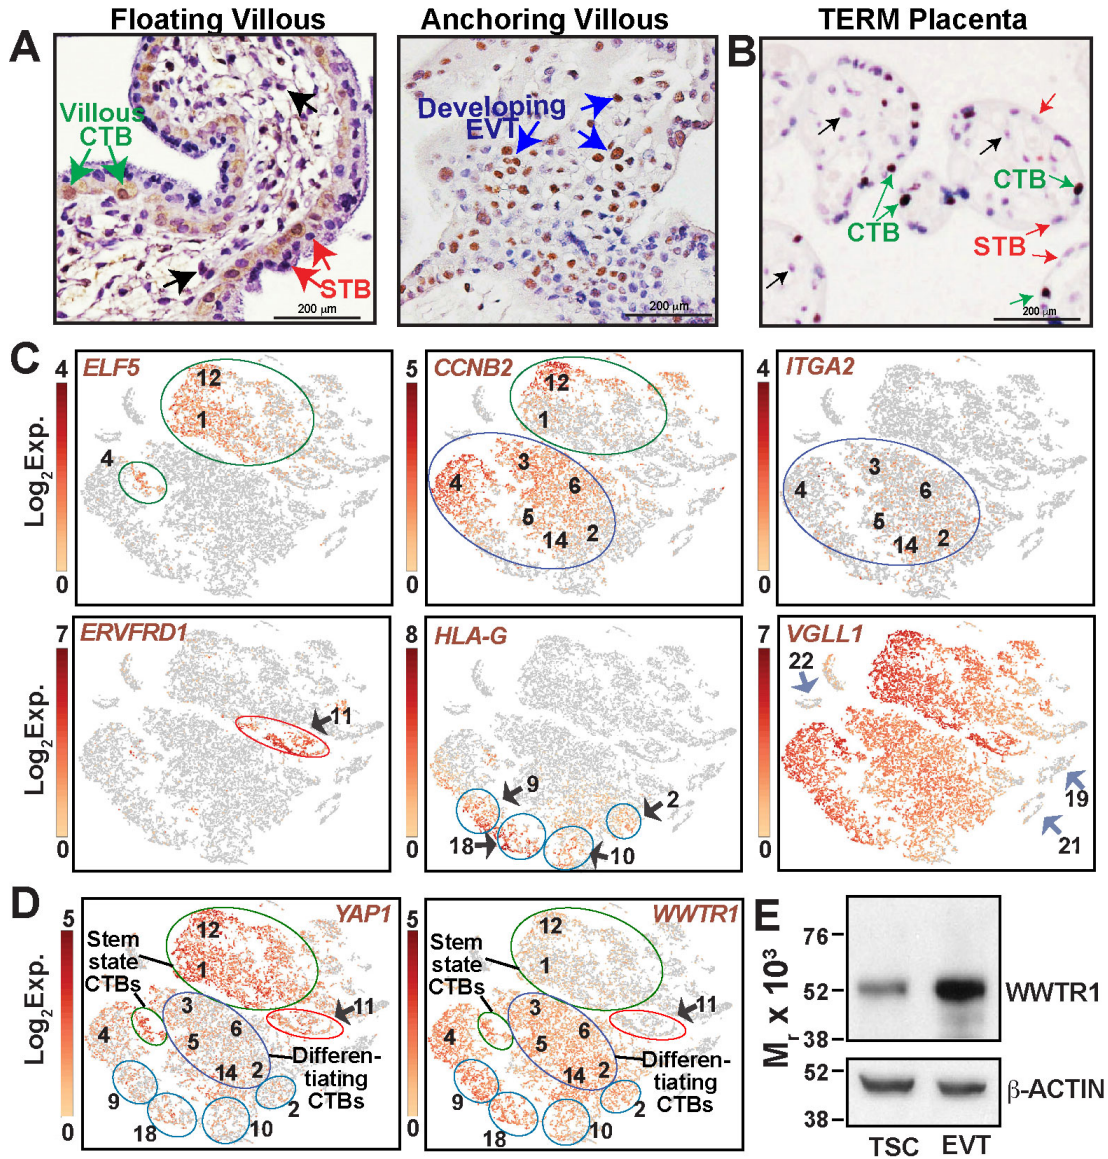

**Fig. 2**

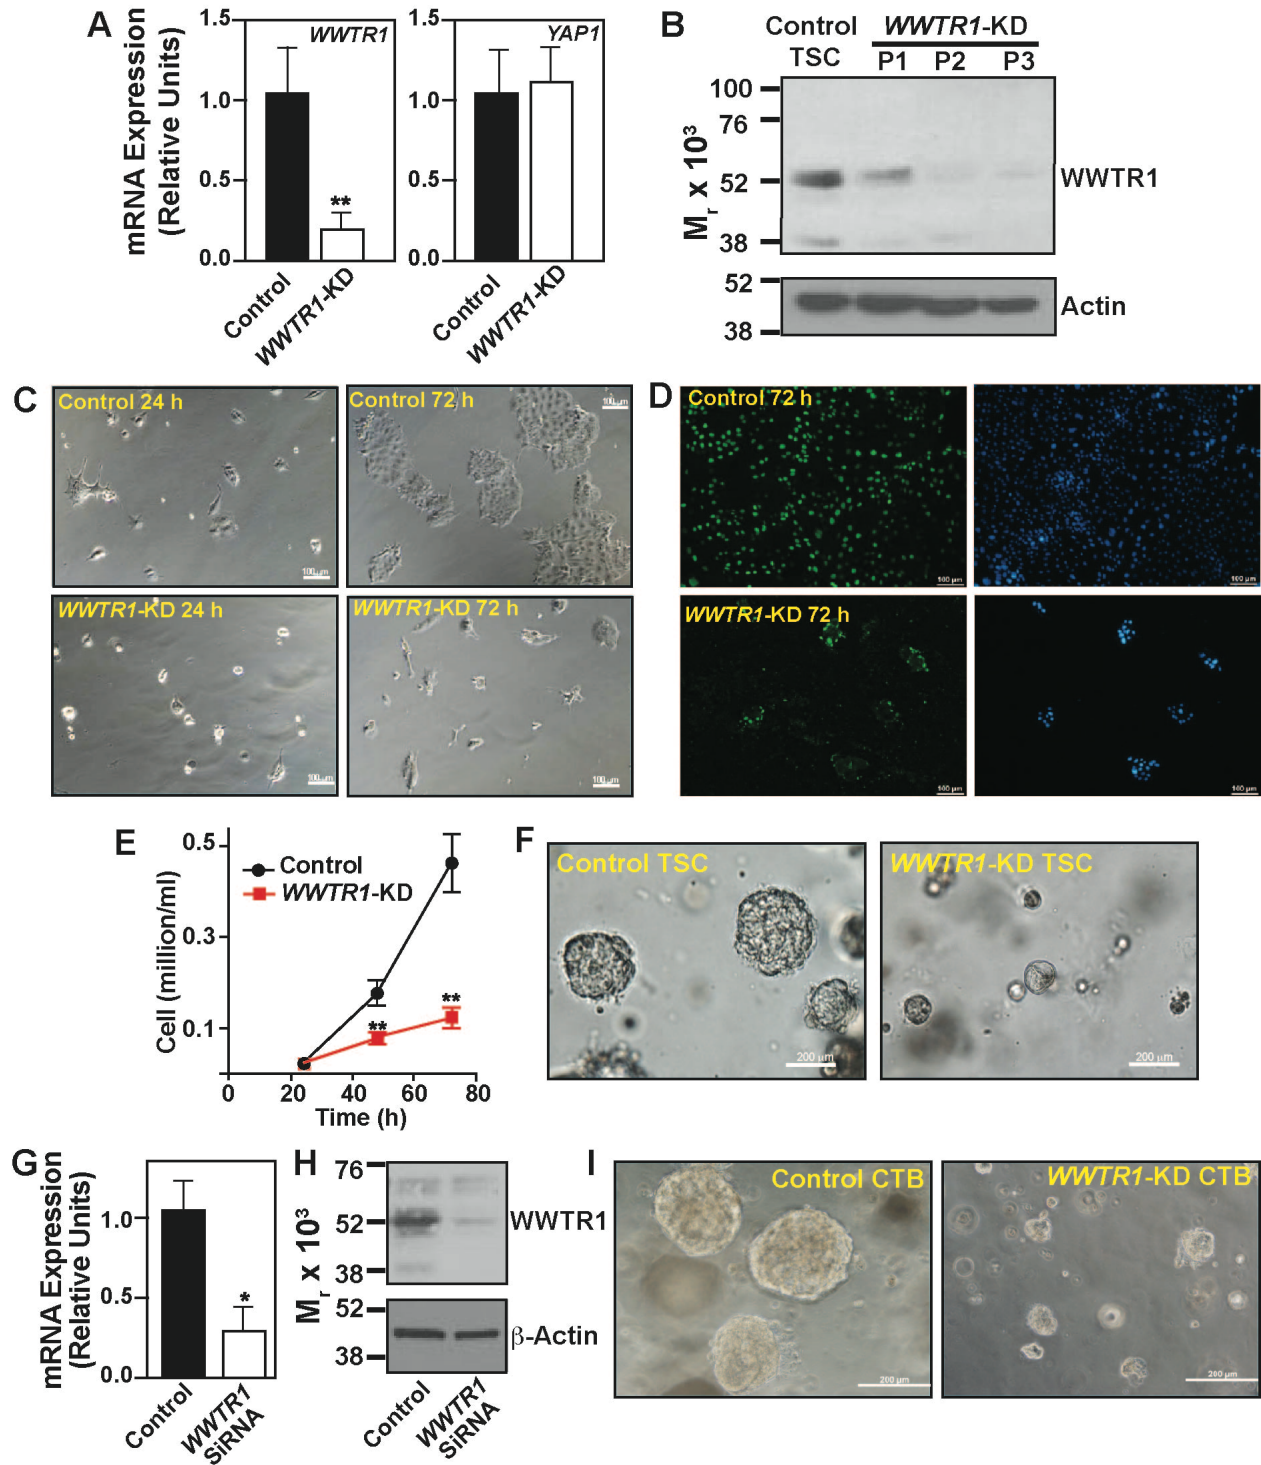



Fig. 3

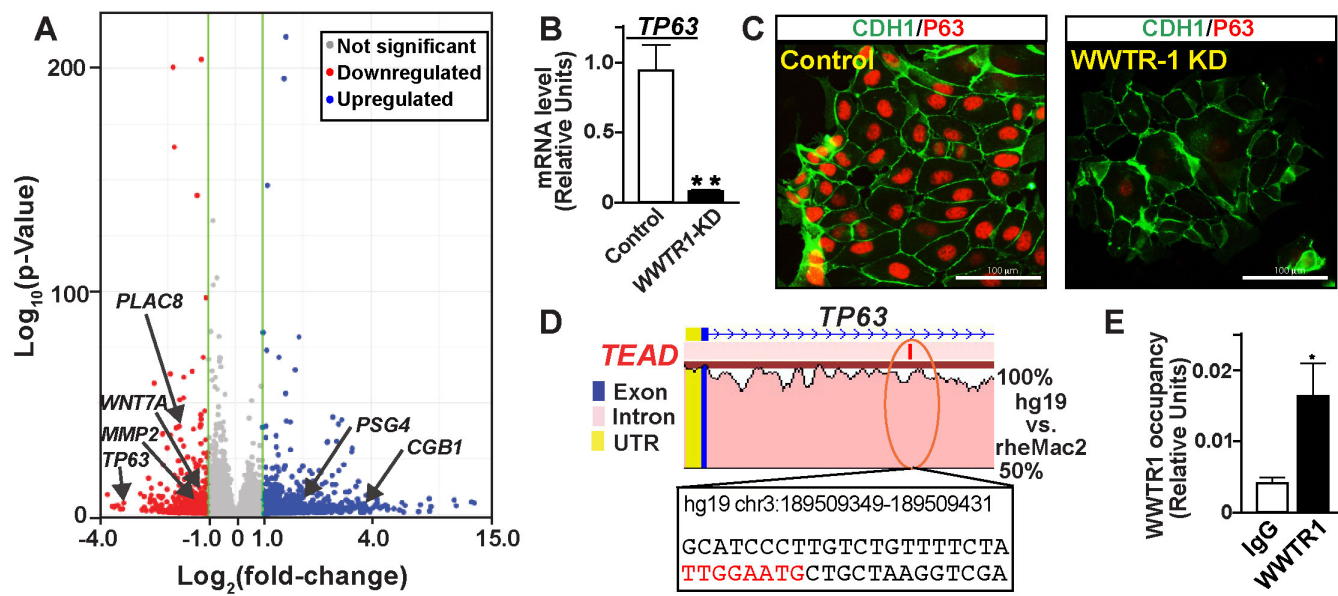

Fig. 4

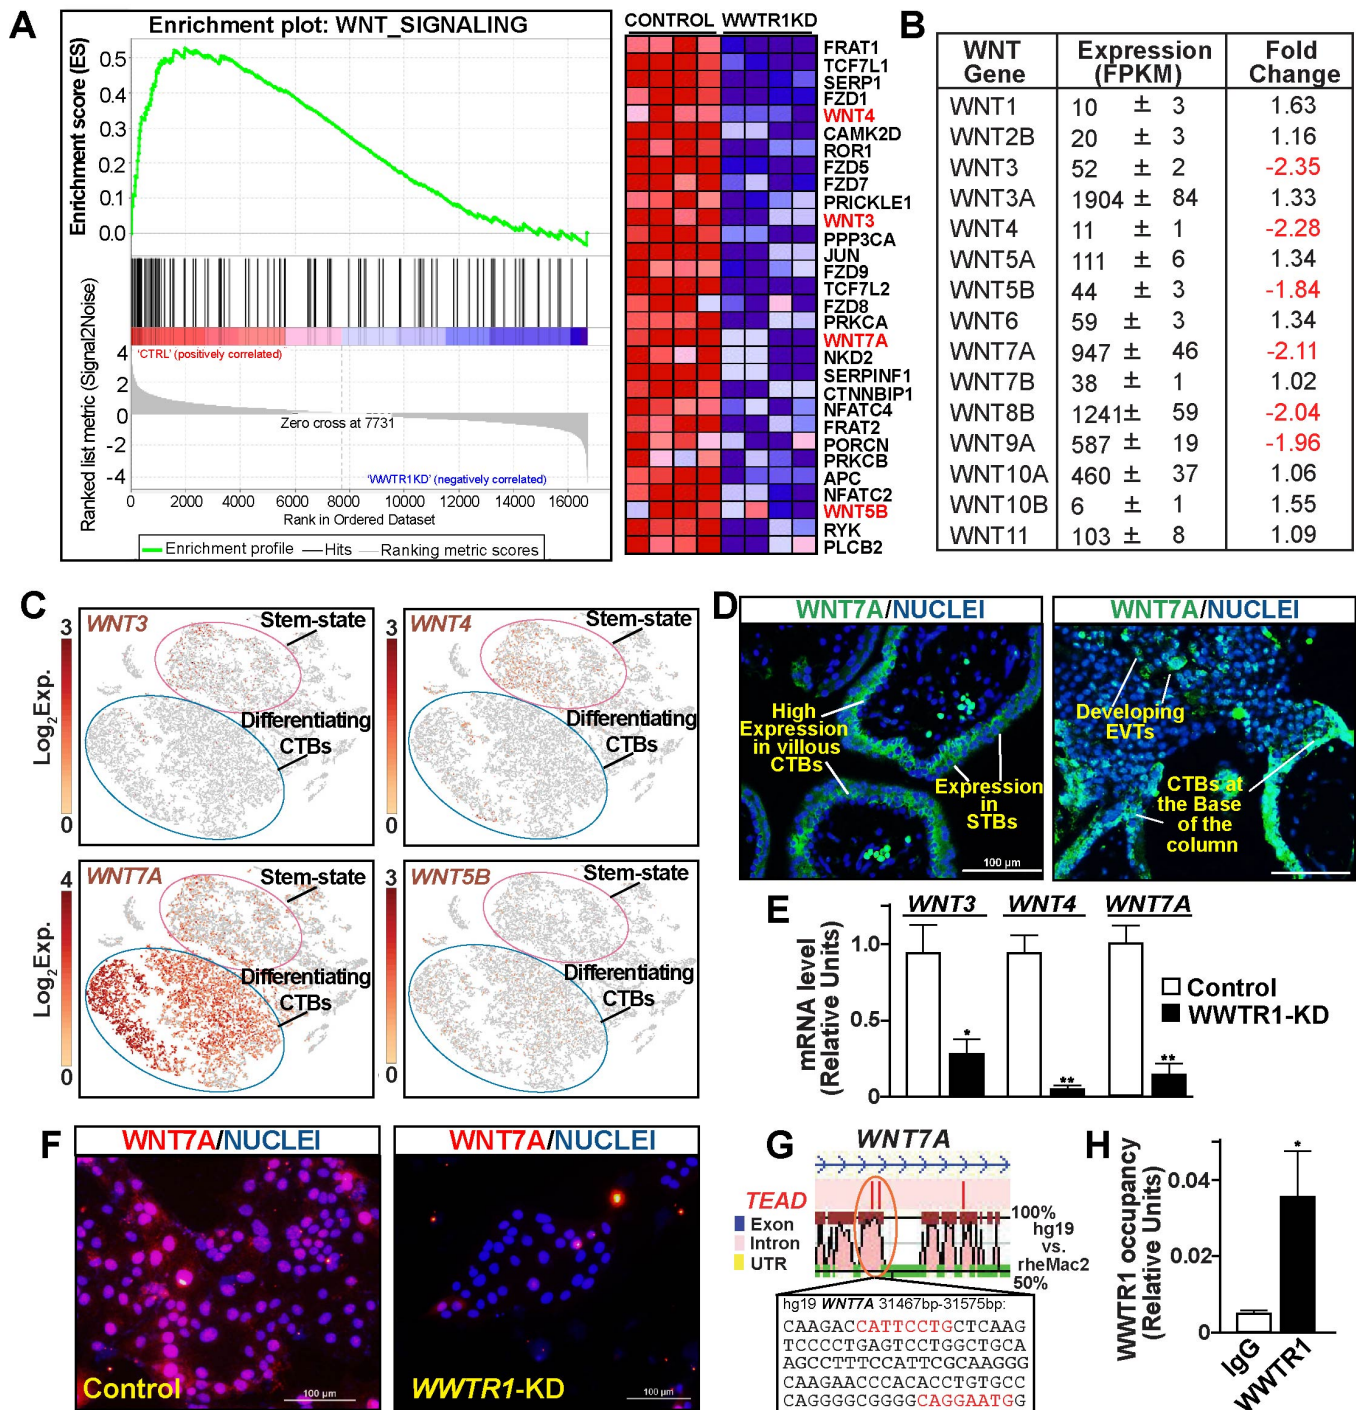

Fig. 5

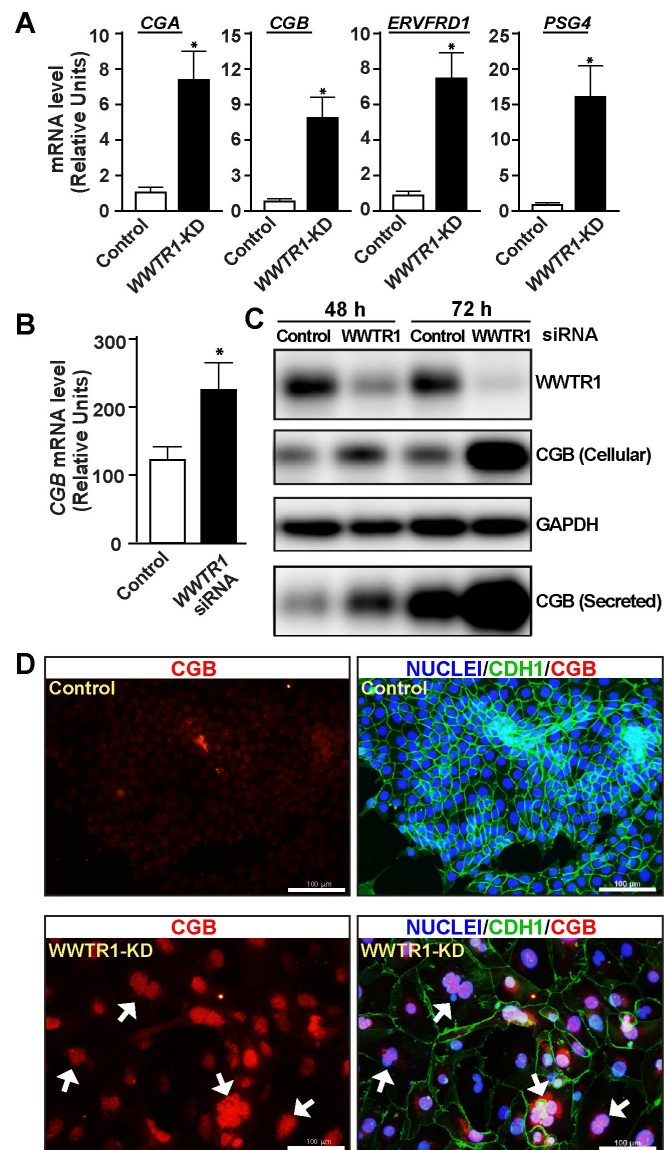



Fig. 6

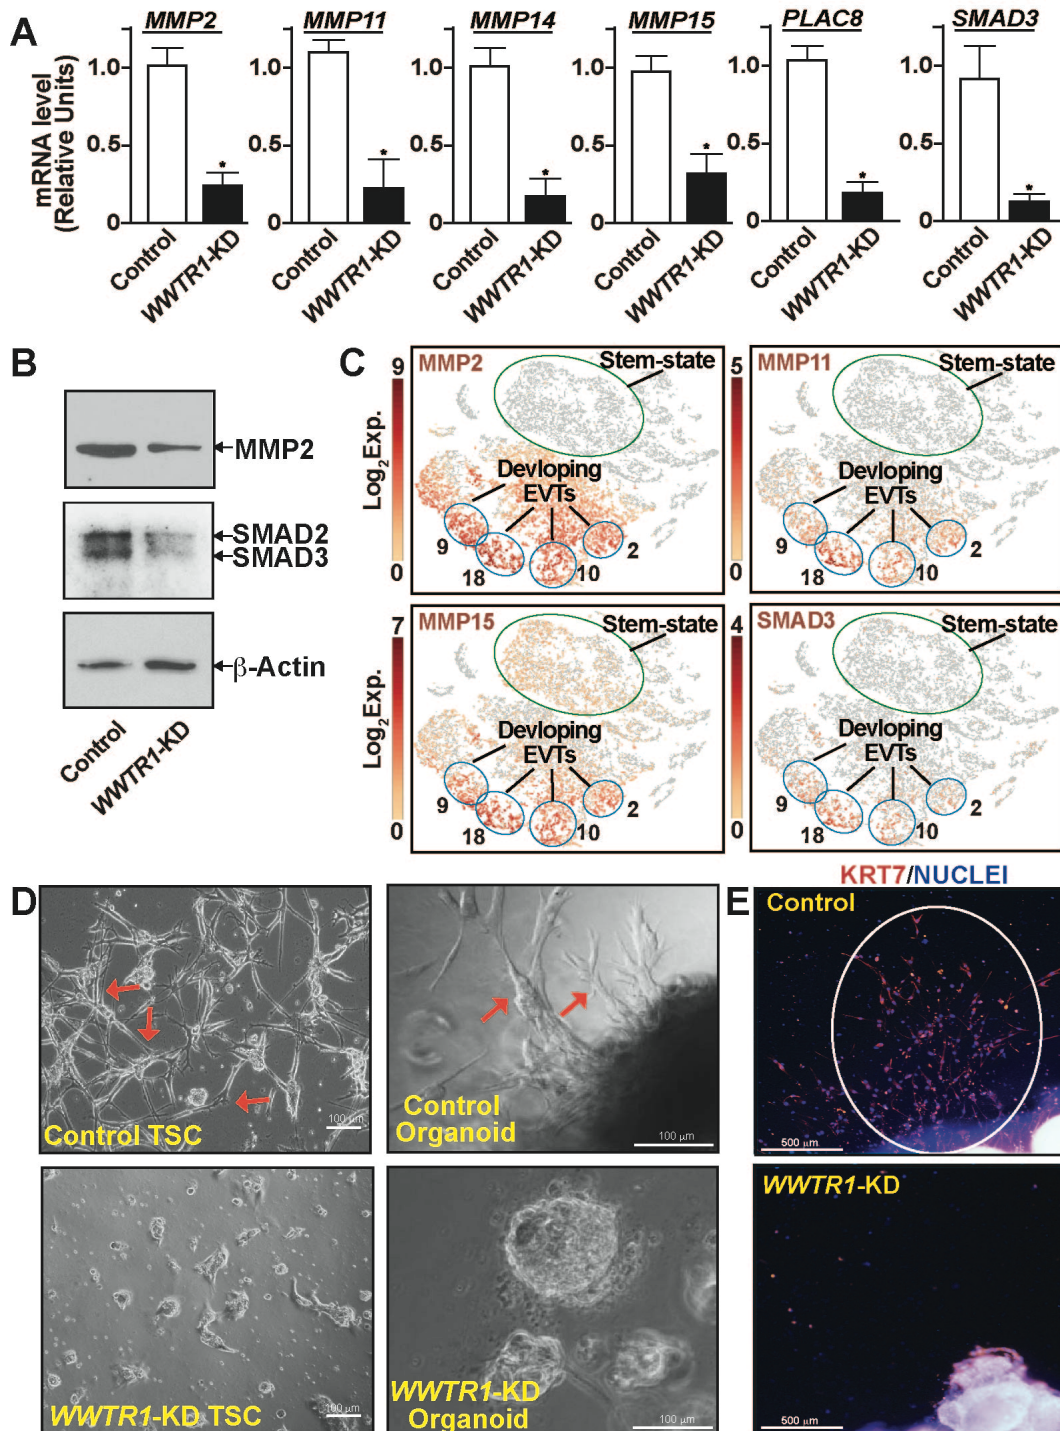

Fig. 7

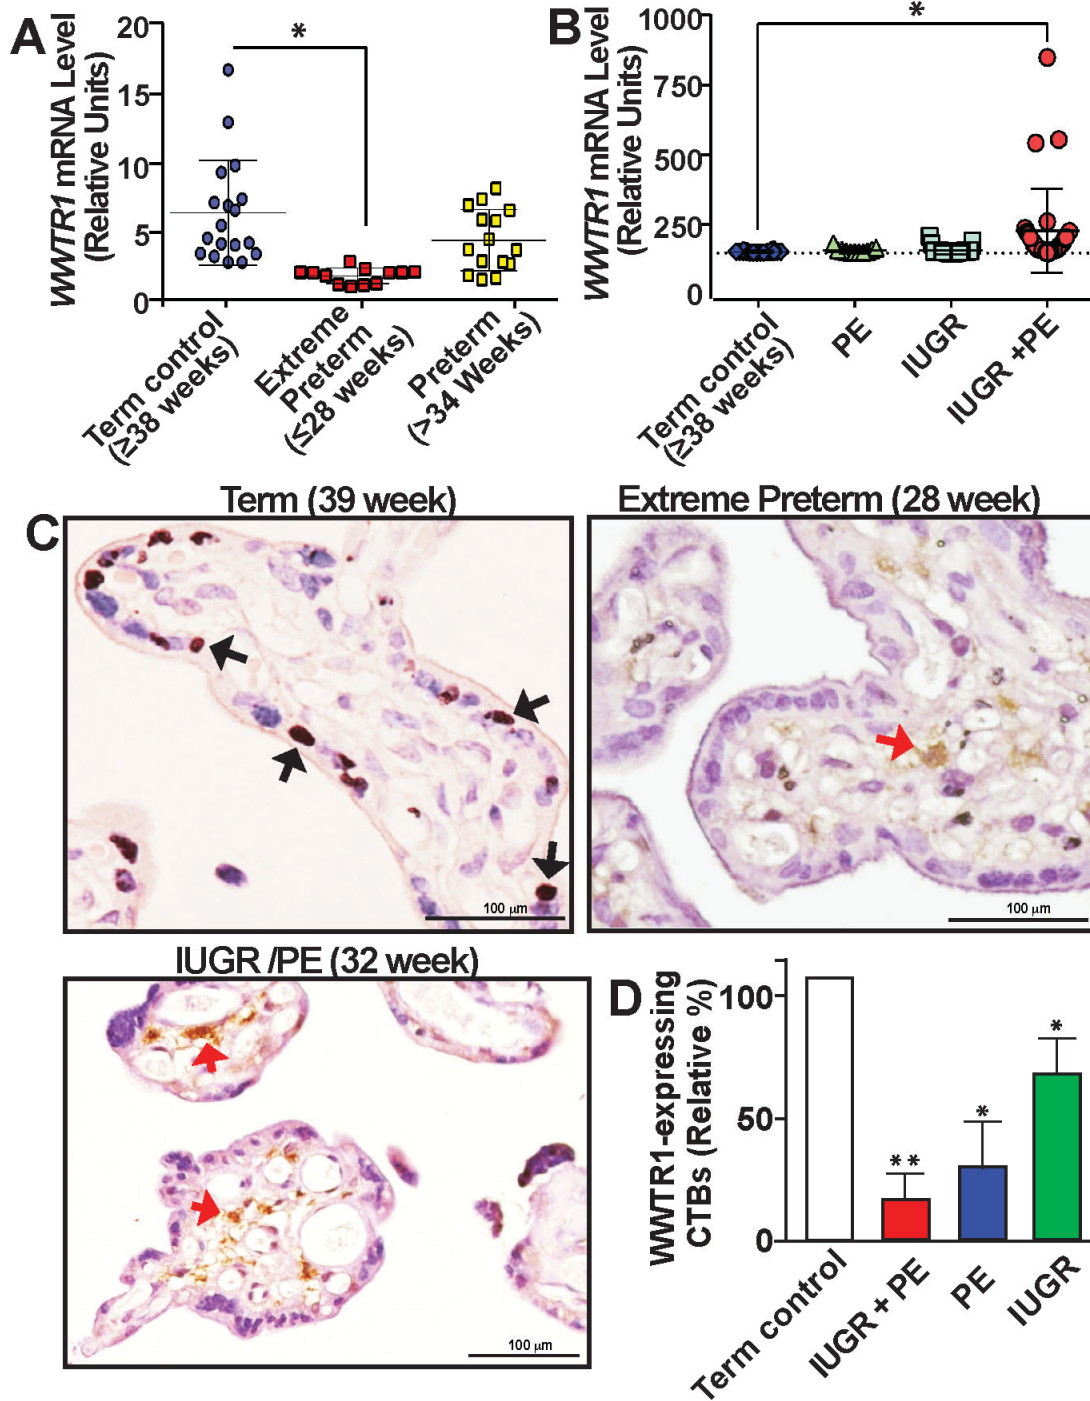

Source: https://www.biorxiv.org/content/10.1101/2022.03.06.483207v1.full.pdf
